# Supplementary material
Source: Springer Nature journal article supplement (https://www.springermedizin.de/resource/supplementary/12993_2009_271_MOESM1_ESM.pdf/9617430)

# Amino acid serum concentrations in 4 subject groups

A/

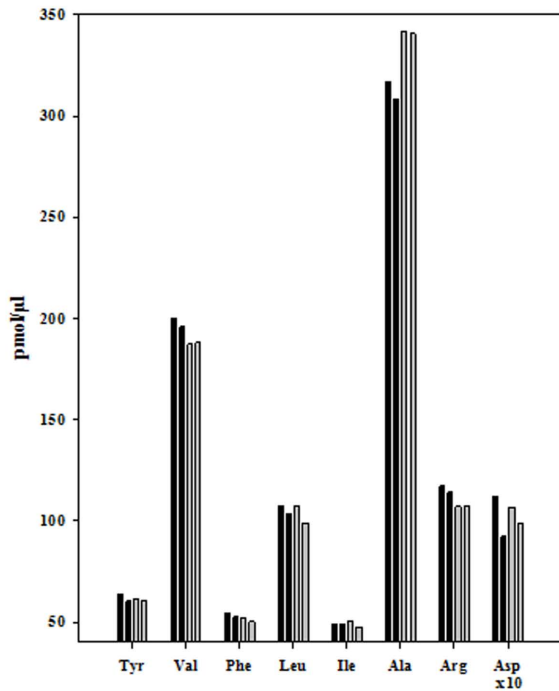

B/

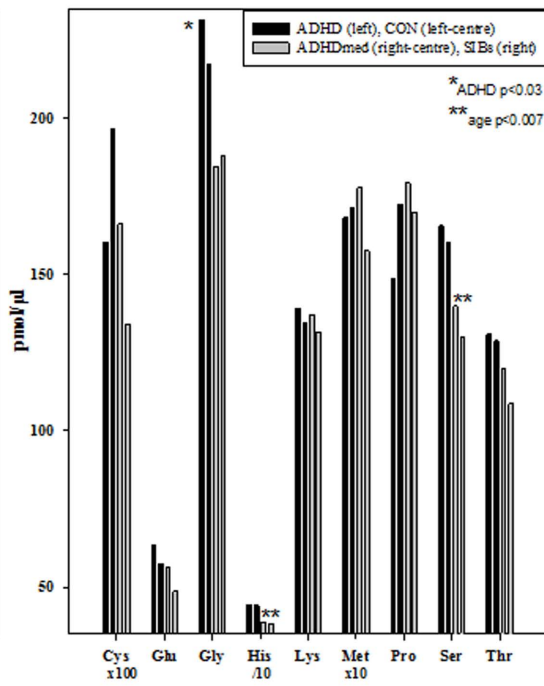

Supplement: MOESM1 [file 9617430]
